# Supplementary material
Source: publisher site journal article supplement (https://www.dovepress.com/get_supplementary_file.php?f=454798.docx)
Supplement: Supplementary file 1 [file get_supplementary_file.php]

**Supplement Tables**

**Table S1** Knowledge dimension

| **Knowledge** | **Correct n (%)** | |
| --- | --- | --- |
| **Patients** | **Families** |
| 1. Are the following statements about psoriasis correct? |  |  |
| 1.1 Psoriasis is a chronic inflammatory skin disease. | 175(67.31) | 194(81.86) |
| 1.2 Psoriasis is an infectious disease that can be Infected by contact with the patient's clothing or skin lesions. | 138(53.08) | 123(51.90) |
| 1.3 Psoriasis is an immune-related disease. | 183(70.38) | 191(80.59) |
| 1.4 Psoriasis is associated with genetic factors. | 130(50.00) | 134(56.54) |
| 2. Which of the following factors can aggravate or trigger psoriasis? |  |  |
| 2.1 Irritating medicine for external use | 147(56.54) | 173(73.00) |
| 2.2 Influenza or other site of infection | 112(43.08) | 127(53.59) |
| 2.3 Alcohol abuse | 166(63.85) | 161(67.93) |
| 2.4 Smoking | 144(55.38) | 154(64.98) |
| 2.5 Dietary factors | 148(56.92) | 176(74.26) |
| 2.6 Anxiety or depression | 162(62.31) | 161(67.93) |
| 2.7 Sports and exercise | 117(45.00) | 135(56.96) |
| 2.8 Pregnancy | 65(25.00) | 74(31.22) |
| 2.9 Psychological trauma or stress | 122(46.92) | 126(53.16) |
| 3. Is the following information about the treatment of psoriasis correct? |  |  |
| 3.1 The sudden discontinuation of hormonal drugs after oral administration may lead to an exacerbation of psoriasis. | 154(59.23) | 170(71.73) |
| 3.2 The use of skin moisturizers is very important for patients with psoriasis. | 165(63.46) | 180(75.95) |
| 3.3 Some drugs such as propranolol and ibuprofen can trigger an onset of psoriasis. | 76(29.23) | 87(36.71) |
| 3.4 The internal medications used to treat psoriasis, such as methotrexate and retinoids, may cause some damage to the body over a long period of time. | 66(25.38) | 143(60.34) |
| 3.5 Biological agents are a new option for the treatment of psoriasis, but the advantages and disadvantages should be carefully weighed and the indications should be carefully screened before starting treatment. | 149(57.31) | 175(73.84) |
| 3.6 Psychological counselling can be helpful in the treatment of psoriasis. | 118(45.38) | 144(60.76) |

**Table S2** Attitudes dimension

|  | **Strongly agree, n (%)** | **Agree, n (%)** | **Neutral, n (%)** | **Disagree, n (%)** | **Strongly disagree, n (%)** |
| --- | --- | --- | --- | --- | --- |
| **Patients** |  |  |  |  |  |
| 1. After being diagnosed with psoriasis, you are under a lot of psychological stress. | 127(48.85) | 52(20.00) | 47(18.08) | 11(4.23) | 23(8.85) |
| 2. You are very worried that psoriasis will inherite to your children. | 133(51.15) | 47(18.08) | 44(16.92) | 15(5.77) | 21(5.77) |
| 3. Because of psoriasis, you are afraid of establishing a marriage relationship or worry that the disease will affect the stability of your marriage. | 94(36.15) | 57(21.92) | 29(22.69) | 18(6.92) | 32(12.31) |
| 4. After being diagnosed with psoriasis, you have become afraid of making friends and socializing, and afraid of letting more people know that you have psoriasis. | 96(36.92) | 62(23.85) | 57(21.92) | 18(6.92) | 27(10.38) |
| 5. Because of psoriasis, you feel embarrassed or uncomfortable in social occasions. | 106(40.77) | 61(23.46) | 49(18.85) | 21(8.08) | 23(8.85) |
| 6. After having psoriasis, you are very concerned about what people think of you and how psoriasis will affect their Attitudes towards you. | 92(35.38) | 70(26.92) | 52(20.00) | 21(8.08) | 25(9.62) |
| 7. After being diagnosed with psoriasis, you are very concerned about the slightest change in your skin and that of other people around you. | 100(38.46) | 74(28.46) | 48(18.46) | 15(5.77) | 23(8.85) |
| 8. After being diagnosed with psoriasis, you have become more introverted. | 71(27.31) | 57(21.92) | 73(28.08) | 27(10.38) | 32(12.31) |
| 9. After having psoriasis, you have become more irritable than before. | 68(26.15) | 63(24.23) | 62(23.85) | 32(12.31) | 35(13.46) |
| 10. After having psoriasis, you are afraid to wear clothing that would expose your skin. | 117(45.00) | 67(25.77) | 34(13.08) | 19(7.31) | 23(8.85) |
| 11. You think it is important to have a positive Attitudes to the management of psoriasis conditions. | 140(53.85) | 63(24.23) | 32(12.31) | 7(2.69) | 18(6.92) |
| 12. After having psoriasis, it is very difficult for you to keep your skin clean and tidy. | 97(37.31) | 65(25.00) | 46(17.69) | 26(10.00) | 26(10.00) |
| 13. You think it is very dangerous to treat psoriasis with informal medication, even though some of them have carcinogenic ingredients. | 98(37.69) | 68(26.15) | 60(23.08) | 10(3.85) | 24(9.23) |
| 14. After having psoriasis, you feel that people around you tend to overlook your advantages. | 68(26.15) | 52(20.00) | 74(28.46) | 30(11.54) | 36(13.85) |
| **Families** |  |  |  |  |  |
| 1. You think that patients with psoriasis are under an amount of psychological stress, so their families should give them more care and support. | 190(80.17) | 32(13.50) | 14(5.91) | 0 | 1(0.42) |
| 2. You can understand if your families' personalities become more grumpy and irritable than before after being diagnosed with psoriasis. | 160(67.51) | 51(21.52) | 21(8.86) | 4(1.69) | 1(0.42) |
| 3. If your families becomes more introverted and reluctant to socialize after being diagnosed with psoriasis, You should encourage and enlighten him/her more. | 188(79.32) | 31(13.08) | 17(7.17) | 1(0.42) | 0 |
| 4. After your families has been diagnosed with psoriasis, you are worried that you may also suffer from psoriasis one day, so you do not want to have much contact with him/her. | 46(19.41) | 19(8.02) | 39(16.46) | 33(13.92) | 100(42.19) |
| 5. You think it is important for patients with psoriasis to be cared for by their families. | 182(76.49) | 29(12.24) | 24(10.13) | 2(0.84) | 0 |
| 6. You think it is important to have a positive Attitudes to the management of psoriasis conditions. | 186(78.48) | 27(1.39) | 23(9.70) | 1(0.42) | 0 |
| 7. You think it is important for patients with psoriasis to keep their skin clean. | 184(77.64) | 31(13.08) | 19(8.02) | 3(1.27) | 0 |
| 8. You think it is very dangerous to treat psoriasis with informal medication, even though some of them have carcinogenic ingredients. | 147(62.03) | 36(15.19) | 40(16.88) | 7(2.95) | 7(2.95) |

**Table S3** Practices dimension

|  | **Always/completely complaint, n (%)** | **Often/relatively complaint, n (%)** | **Sometimes/moderately, n (%)** | **Occasionally/ relatively not complaint, n (%)** | **Never/ not complaint at all, n (%)** |
| --- | --- | --- | --- | --- | --- |
| **Patients** |  |  |  |  |  |
| 1. You will have regular follow-up appointments with your regular doctor. | 93(35.77) | 73(28.08) | 60(23.08) | 14(5.38) | 20(7.69) |
| 2. You will carefully follow the order of administration of topical medication as instructed by your doctor. | 121(46.54) | 67(25.77) | 47(18.08) | 10(3.85) | 15(5.77) |
| 3. You will complete your light irradiation treatment on time. | 83(31.92) | 59(22.69) | 63(24.23) | 27(10.38) | 28(10.77) |
| 4. You will refuse the internal medications prescribed by your doctor. | 46(17.69) | 44(16.92) | 75(28.85) | 42(16.15) | 53(20.38) |
| 5. You will choose appropriate clothing according to the condition of your skin. | 113(43.46) | 74(28.46) | 48(18.46) | 8(3.08) | 17(6.54) |
| 6. You will refrain from smoking and alcohol as prescribed by your doctor. | 117(45.00) | 61(23.46) | 56(21.54) | 9(3.46) | 17(6.54) |
| 7. You will try to get enough sleep since you have been ill. | 99(38.08) | 77(29.62) | 53(20.38) | 11(4.23) | 20(7.69) |
| 8. Due to psoriasis, you bathe and change your clothing frequently to keep yourself clean. | 92(35.38) | 96(36.92) | 42(16.15) | 12(4.62) | 18(5.92) |
| 9. Due to psoriasis, you have regular health check-ups. | 83(31.92) | 73(28.08) | 63(24.23) | 17(6.54) | 24(9.23) |
| 10. Due to psoriasis, you will seek regular psychological counselling. | 51(19.62) | 45(17.31) | 77(29.62) | 34(13.08) | 53(20.38) |
| 11. You will refuse the administration of informal drugs. | 100(38.46) | 53(20.38) | 70(26.92) | 10(3.85) | 27(10.38) |
| 12. You will join a group of psoriasis patients to share your experiences of treatment. | 69(26.54) | 61(23.46) | 80(30.77) | 21(8.08) | 29(11.15) |
| 13. You will remain active and socially engaged after being diagnosed with psoriasis. | 74(28.46) | 66(25.38) | 83(31.92) | 16(6.15) | 21(8.08) |
| 14. You will try to avoid physical contact with other people after being diagnosed with psoriasis. | 84(32.31) | 76(29.23) | 56(21.54) | 21(8.08) | 23(8.85) |
| 15. You find that you lose friends or jobs after having psoriasis. | 48(18.46) | 39(15.00) | 80(30.77) | 46(17.69) | 47(18.08) |
| 16. You will actively learning about psoriasis. | 102(39.23) | 71(27.31) | 58(22.31) | 10(3.85) | 19(7.31) |
| **Families** |  |  |  |  |  |
| 1. You will supervise the patient to go for regular follow-ups. | 182(76.79) | 39(16.46) | 14(5.91) | 2(0.84) | 0 |
| 2. You will supervise the patient to go for regular medical check-ups. | 169(71.31) | 45(18.99) | 20(8.44) | 3(1.27) | 0 |
| 3. You will assist the patient with the administration of topical medication if the patient needs it (e.g. daub of topical medication on the back). | 178(75.11) | 37(15.61) | 20(8.44) | 2(0.84) | 0 |
| 4. You will monitor the patient's avoidance of smoking and alcohol. | 184(77.64) | 31(13.08) | 21(8.86) | 1(0.42) | 0 |
| 5. You will care for and encourage the patient frequently. | 184(77.64) | 36(15.19) | 17(7.17) | 0 | 0 |
| 6. You will stop the patient if you see him/her using informal medication. | 176(74.26) | 36(15.19) | 25(10.55) | 0 | 0 |
| 7. You will encourage the patient to join the groups of psoriasis patients to increase their communication with the outside world. | 163(68.78) | 41(17.30) | 32(13.50) | 1(0.42) | 0 |
| 8. You will actively learn about psoriasis. | 158(66.67) | 50(21.10) | 26(10.97) | 2(0.84) | 1(0.42) |

**Table S4** Model fit for Figure 1.

| **Indicator** | **Ref.** | **Measured results** |
| --- | --- | --- |
| **CMIN/DF** | 1-3 excellent, 3-5 good | 2.596 |
| **RMSEA** | <0.08 good | 0.079 |
| **IFI** | >0.8 good | 0.794 |
| **TLI** | >0.8 good | 0.781 |
| **CFI** | >0.8 good | 0.793 |

**Table S5** Model fit for Figure 2

| **Indicator** | **Ref.** | **Measured results** |
| --- | --- | --- |
| **CMIN/DF** | 1-3 excellent, 3-5 good | 2.366 |
| **RMSEA** | <0.08 good | 0.073 |
| **IFI** | >0.8 good | 0.824 |
| **TLI** | >0.8 good | 0.813 |
| **CFI** | >0.8 good | 0.823 |

**Table S6** Model fit for Figure 3

| **Indicator** | **Ref.** | **Measured results** |
| --- | --- | --- |
| **CMIN/DF** | 1-3 excellent, 3-5 good | 2.247 |
| **RMSEA** | <0.08 good | 0.073 |
| **IFI** | >0.8 good | 0.847 |
| **TLI** | >0.8 good | 0.833 |
| **CFI** | >0.8 good | 0.846 |

**Table S7** Model fit for Figure 4.

| **Indicator** | **Ref.** | **Measured results** |
| --- | --- | --- |
| **CMIN/DF** | 1-3 excellent, 3-5 good | 2.392 |
| **RMSEA** | <0.08 good | 0.077 |
| **IFI** | >0.8 good | 0.830 |
| **TLI** | >0.8 good | 0.814 |
| **CFI** | >0.8 good | 0.828 |
